# Supplementary material for: Genomics of Aerobic Cellulose Utilization Systems in Actinobacteria
Source: PubMed Central journal article supplement (PMC3377646; doi:10.1371/journal.pone.0039331), 2012-06-18
Supplement: pone.0039331.s001.pdf [file pone.0039331.s001.pdf]

— CBM2 — catalytic domain GH48 — type I (*T. fusca*-like)

— catalytic domain GH48 — CBM2/3 — type II (*C. flavigena*-like)

(a) Reducing end exocellulases (GH48)

— CBM2 — catalytic domain GH6 — type I (*T. fusca*-like)

— catalytic domain GH48 — CBM2/3 — type II (*C. flavigena*-like)

(b) Non-reducing end exocellulases (GH6)

— catalytic domain GH6 — CBM2 — type I (*T. fusca*-like)

— CBM2 — catalytic domain GH6 — type II (*C. flavigena*-like)

(c) Non-processive endocellulases (GH6)
