# Supplementary material for: Genomics of Aerobic Cellulose Utilization Systems in Actinobacteria
Source: PubMed Central journal article supplement (PMC3377646; doi:10.1371/journal.pone.0039331), 2012-06-18

0.1

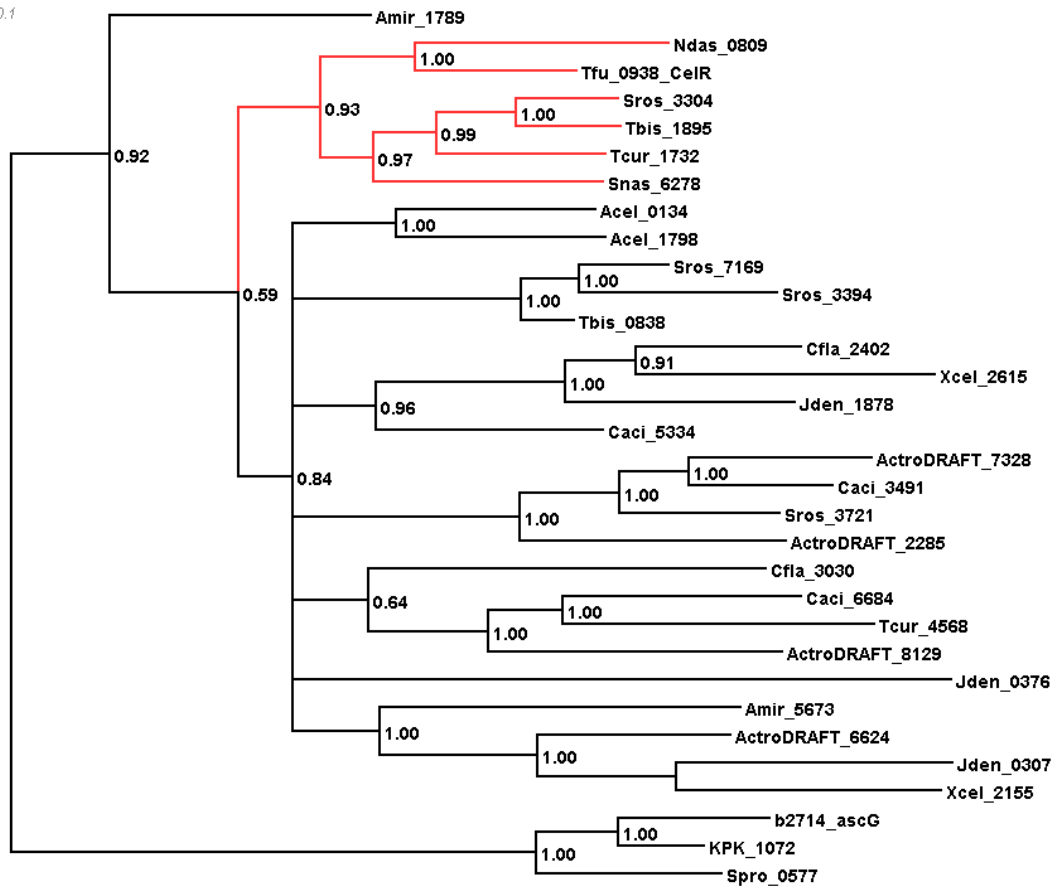

Supplement: pone.0039331.s002.pdf [file pone.0039331.s002.pdf]
